# Supplementary material for: Hypoglycemic Effects of Extracts Obtained from Endemic Betonica bulgarica Degen and Neič
Source: MDPI journal article supplement (doi:10.3390/plants13101406), 2024-05-18
Supplement: s1 [file s1]

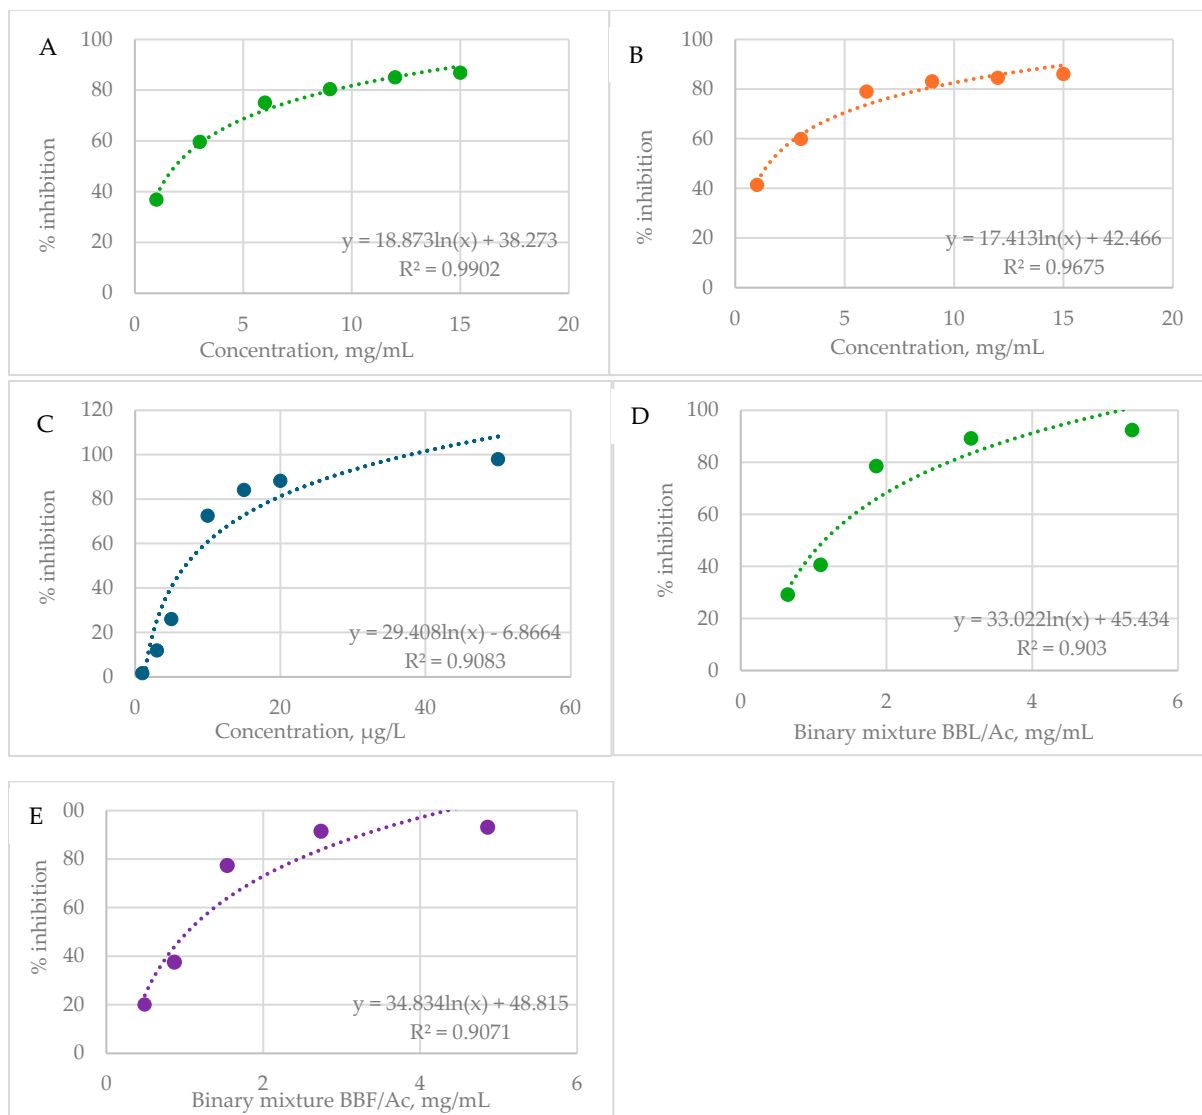

Figure S1. Concentration-effect plots for: A. Leaf extract; B. Flower extract; C. Acarbose; D. Binary mixture leaf extract-acarbose; E. Binary mixture flower extract-acarbose. Since the concentration of acarbose is three orders of magnitude lower than that of extracts, only the concentration of extract is shown.
