# Supplementary material for: Hypoglycemic Effects of Extracts Obtained from Endemic Betonica bulgarica Degen and Neič
Source: MDPI journal article supplement (doi:10.3390/plants13101406), 2024-05-18
Supplement: s1 [file s1]

## IM-BAS

Project Name: project  
Reported by User: System

*Breeze*

## SAMPLE INFORMATION

|              |               |                   |                       |
|--------------|---------------|-------------------|-----------------------|
| Sample Name: | BBF_1         | Acquired By:      | System                |
| Sample Type: | Unknown       | Sample Set Name:  |                       |
| Vial:        | 999           | Acq. Method:      | PolyPhenols           |
| Injection #: | 4             | Date Acquired:    | 02.9.2021 a. 13:13:13 |
| Run Time:    | 75,00 Minutes | Injection Volume: | 20,00 ul              |

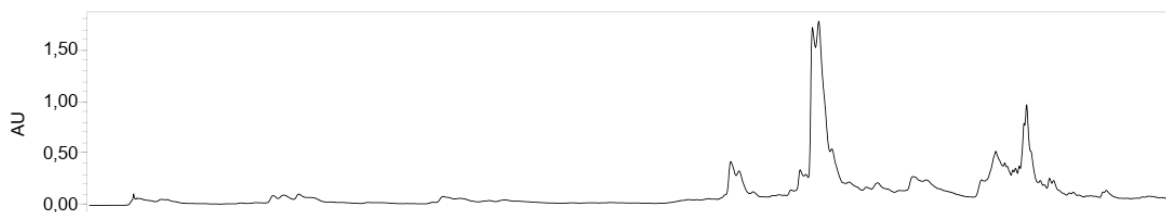

Channel: 2487Channel 1 Channel Desc.: Pa 280 nm Processing Method: PolyPhenols UV

|    | Channel Description | Peak Name          | RT (min) | Area (µV*sec) | % Area | Height (µV) | Amount | Units |
|----|---------------------|--------------------|----------|---------------|--------|-------------|--------|-------|
| 1  | Pa 280 nm           |                    | 1,006    | 1639          | 0,00   | 72          |        |       |
| 2  | Pa 280 nm           |                    | 1,226    | 316           | 0,00   | 44          |        |       |
| 3  | Pa 280 nm           |                    | 1,283    | 383           | 0,00   | 48          |        |       |
| 4  | Pa 280 nm           |                    | 1,612    | 136           | 0,00   | 30          |        |       |
| 5  | Pa 280 nm           |                    | 3,081    | 1540175       | 0,32   | 107634      |        |       |
| 6  | Pa 280 nm           |                    | 3,304    | 520919        | 0,11   | 68989       |        |       |
| 7  | Pa 280 nm           |                    | 3,423    | 3575993       | 0,74   | 66211       |        |       |
| 8  | Pa 280 nm           |                    | 5,030    | 1938487       | 0,40   | 54887       |        |       |
| 9  | Pa 280 nm           |                    | 5,372    | 3510619       | 0,73   | 52748       |        |       |
| 10 | Pa 280 nm           | Gallic acid        | 6,405    |               |        |             |        |       |
| 11 | Pa 280 nm           |                    | 7,927    | 757161        | 0,16   | 12144       |        |       |
| 12 | Pa 280 nm           |                    | 10,447   | 1051929       | 0,22   | 15578       |        |       |
| 13 | Pa 280 nm           | Protocatehuic acid | 11,481   | 1094016       | 0,23   | 18742       | 32,802 | ug/ml |

## IM-BAS

Project Name: project  
Reported by User: System



|    | Channel Description | Peak Name        | RT (min) | Area (V*sec) | % Area | Height (V) | Amount | Units |
|----|---------------------|------------------|----------|--------------|--------|------------|--------|-------|
| 14 | Pa 280 nm           |                  | 12,672   | 2920536      | 0,61   | 85815      |        |       |
| 15 | Pa 280 nm           |                  | 13,391   | 4566406      | 0,95   | 90359      |        |       |
| 16 | Pa 280 nm           |                  | 14,432   | 4210334      | 0,87   | 98313      |        |       |
| 17 | Pa 280 nm           |                  | 15,162   | 3848739      | 0,80   | 66323      |        |       |
| 18 | Pa 280 nm           |                  | 16,549   | 838531       | 0,17   | 20766      |        |       |
| 19 | Pa 280 nm           |                  | 17,375   | 995144       | 0,21   | 15777      |        |       |
| 20 | Pa 280 nm           |                  | 19,213   | 532171       | 0,11   | 14051      |        |       |
| 21 | Pa 280 nm           | (+)-Catechin     | 19,762   | 846630       | 0,18   | 12237      | 61,049 | ug/ml |
| 22 | Pa 280 nm           |                  | 21,853   | 23562        | 0,00   | 1045       |        |       |
| 23 | Pa 280 nm           |                  | 23,001   | 3277         | 0,00   | 260        |        |       |
| 24 | Pa 280 nm           |                  | 23,657   | 376358       | 0,08   | 15136      |        |       |
| 25 | Pa 280 nm           | Chlorogenic acid | 24,358   | 3969202      | 0,82   | 70168      | 97,498 | ug/ml |
| 26 | Pa 280 nm           |                  | 25,503   | 3619857      | 0,75   | 51833      |        |       |
| 27 | Pa 280 nm           | Vanillic acid    | 27,549   | 1673678      | 0,35   | 28939      | 54,279 | ug/ml |
| 28 | Pa 280 nm           | Caffeic acid     | 28,634   | 3970818      | 0,82   | 34041      | 44,937 | ug/ml |
| 29 | Pa 280 nm           |                  | 31,800   | 38468        | 0,01   | 3111       |        |       |
| 30 | Pa 280 nm           |                  | 32,378   | 23993        | 0,00   | 1364       |        |       |
| 31 | Pa 280 nm           | Syringic acid    | 33,287   | 104979       | 0,02   | 3054       | 3,826  | ug/ml |
| 32 | Pa 280 nm           |                  | 34,333   | 13022        | 0,00   | 752        |        |       |
| 33 | Pa 280 nm           |                  | 35,433   | 20709        | 0,00   | 1789       |        |       |
| 34 | Pa 280 nm           |                  | 35,858   | 217093       | 0,04   | 4952       |        |       |
| 35 | Pa 280 nm           | (-)-Epicatechin  | 36,692   | 88095        | 0,02   | 3218       | 13,061 | ug/ml |
| 36 | Pa 280 nm           |                  | 37,228   | 85647        | 0,02   | 3113       |        |       |
| 37 | Pa 280 nm           |                  | 37,681   | 126178       | 0,03   | 3487       |        |       |
| 38 | Pa 280 nm           |                  | 41,245   | 2805060      | 0,58   | 39737      |        |       |
| 39 | Pa 280 nm           |                  | 41,777   | 993289       | 0,21   | 38693      |        |       |
| 40 | Pa 280 nm           | p-Coumaric acid  | 42,552   | 2094282      | 0,43   | 48700      | 14,457 | ug/ml |
| 41 | Pa 280 nm           |                  | 42,979   | 970892       | 0,20   | 45073      |        |       |
| 42 | Pa 280 nm           |                  | 44,136   | 14374593     | 2,98   | 411327     |        |       |
| 43 | Pa 280 nm           |                  | 44,705   | 11950797     | 2,48   | 318959     |        |       |
| 44 | Pa 280 nm           | Ferulic acid     | 45,672   | 4292930      | 0,89   | 116920     | 53,845 | ug/ml |
| 45 | Pa 280 nm           |                  | 46,248   | 751758       | 0,16   | 68769      |        |       |
| 46 | Pa 280 nm           |                  | 46,437   | 943566       | 0,20   | 67929      |        |       |

## IM-BAS

Project Name: project  
Reported by User: System



|    | Channel Description | Peak Name       | RT (min) | Area (V*sec) | % Area | Height (V) | Amount   | Units |
|----|---------------------|-----------------|----------|--------------|--------|------------|----------|-------|
| 47 | Pa 280 nm           |                 | 47,031   | 2455902      | 0,51   | 81459      |          |       |
| 48 | Pa 280 nm           |                 | 47,414   | 2809484      | 0,58   | 88107      |          |       |
| 49 | Pa 280 nm           |                 | 47,833   | 1253615      | 0,26   | 84570      |          |       |
| 50 | Pa 280 nm           |                 | 48,275   | 3603398      | 0,75   | 136014     |          |       |
| 51 | Pa 280 nm           |                 | 48,909   | 9093133      | 1,88   | 333058     |          |       |
| 52 | Pa 280 nm           |                 | 49,305   | 5270252      | 1,09   | 288314     |          |       |
| 53 | Pa 280 nm           | Salicylic acid  | 49,753   | 36230142     | 7,51   | 1719220    | 2254,173 | ug/ml |
| 54 | Pa 280 nm           |                 | 50,177   | 70293270     | 14,56  | 1777517    |          |       |
| 55 | Pa 280 nm           |                 | 51,083   | 22558761     | 4,67   | 537269     |          |       |
| 56 | Pa 280 nm           |                 | 52,246   | 12424159     | 2,57   | 214945     |          |       |
| 57 | Pa 280 nm           | Rutin           | 53,446   | 5583372      | 1,16   | 165373     | 343,925  | ug/ml |
| 58 | Pa 280 nm           | Hesperidin      | 54,254   | 15372196     | 3,19   | 208498     | 250,890  | ug/ml |
| 59 | Pa 280 nm           |                 | 55,716   | 3472592      | 0,72   | 135219     |          |       |
| 60 | Pa 280 nm           | Rosmarinic acid | 55,914   | 1599517      | 0,33   | 134130     | 33,941   | ug/ml |
| 61 | Pa 280 nm           |                 | 56,643   | 16390574     | 3,40   | 271373     |          |       |
| 62 | Pa 280 nm           |                 | 57,560   | 28393206     | 5,88   | 239333     |          |       |
| 63 | Pa 280 nm           |                 | 60,700   | 511958       | 0,11   | 74180      |          |       |
| 64 | Pa 280 nm           |                 | 61,377   | 7555607      | 1,57   | 241568     |          |       |
| 65 | Pa 280 nm           |                 | 62,351   | 29215817     | 6,05   | 519224     |          |       |
| 66 | Pa 280 nm           |                 | 62,972   | 5052231      | 1,05   | 406316     |          |       |
| 67 | Pa 280 nm           |                 | 63,140   | 6437541      | 1,33   | 374288     |          |       |
| 68 | Pa 280 nm           | Quercetin       | 63,525   | 3825533      | 0,79   | 338662     | 121,078  | ug/ml |
| 69 | Pa 280 nm           |                 | 63,716   | 5014718      | 1,04   | 354264     |          |       |
| 70 | Pa 280 nm           |                 | 63,970   | 4223756      | 0,88   | 377134     |          |       |
| 71 | Pa 280 nm           |                 | 64,308   | 10629811     | 2,20   | 794371     |          |       |
| 72 | Pa 280 nm           |                 | 64,476   | 28971565     | 6,00   | 975182     |          |       |
| 73 | Pa 280 nm           |                 | 65,411   | 4151548      | 0,86   | 237236     |          |       |
| 74 | Pa 280 nm           | Kaempferol      | 65,685   | 2969778      | 0,62   | 196178     | 86,740   | ug/ml |
| 75 | Pa 280 nm           |                 | 66,050   | 4406785      | 0,91   | 258818     |          |       |
| 76 | Pa 280 nm           |                 | 66,326   | 9471568      | 1,96   | 237651     |          |       |
| 77 | Pa 280 nm           |                 | 67,409   | 1976460      | 0,41   | 117083     |          |       |
| 78 | Pa 280 nm           |                 | 67,687   | 2880579      | 0,60   | 124803     |          |       |
| 79 | Pa 280 nm           |                 | 68,083   | 2407028      | 0,50   | 97100      |          |       |

## IM-BAS

Project Name: project  
Reported by User: System

*Breeze*

|    | Channel Description | Peak Name | RT (min) | Area (V*sec) | % Area | Height (V) | Amount | Units |
|----|---------------------|-----------|----------|--------------|--------|------------|--------|-------|
| 80 | Pa 280 nm           |           | 68,587   | 1446731      | 0,30   | 89030      |        |       |
| 81 | Pa 280 nm           |           | 68,833   | 4071870      | 0,84   | 90480      |        |       |
| 82 | Pa 280 nm           |           | 69,737   | 1891156      | 0,39   | 127068     |        |       |
| 83 | Pa 280 nm           |           | 69,950   | 6663891      | 1,38   | 143497     |        |       |
| 84 | Pa 280 nm           |           | 71,036   | 1133333      | 0,23   | 67264      |        |       |
| 85 | Pa 280 nm           |           | 71,377   | 1781558      | 0,37   | 68110      |        |       |
| 86 | Pa 280 nm           |           | 72,088   | 2150712      | 0,45   | 68962      |        |       |
| 87 | Pa 280 nm           |           | 72,428   | 1919367      | 0,40   | 81036      |        |       |
| 88 | Pa 280 nm           |           | 72,823   | 4873308      | 1,01   | 88141      |        |       |
| 89 | Pa 280 nm           |           | 73,771   | 3898493      | 0,81   | 74943      |        |       |

## SAMPLE INFORMATION

|              |               |                   |                       |
|--------------|---------------|-------------------|-----------------------|
| Sample Name: | BBF_1         | Acquired By:      | System                |
| Sample Type: | Unknown       | Sample Set Name:  |                       |
| Vial:        | 999           | Acq. Method:      | PolyPhenols           |
| Injection #: | 4             | Date Acquired:    | 02.9.2021 a. 13:13:13 |
| Run Time:    | 75,00 Minutes | Injection Volume: | 20,00 ul              |

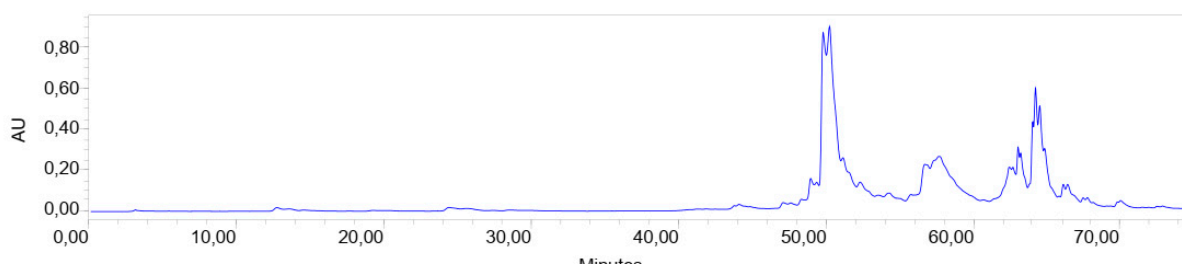

Channel: 2487Channel 2 Channel Desc.: FL 360 nm Processing Method: PolyPhenols UV

|    | Channel Description | Peak Name        | RT (min) | Area (V*sec) | % Area | Height (V) | Amount | Units |
|----|---------------------|------------------|----------|--------------|--------|------------|--------|-------|
| 1  | FL 360 nm           |                  | 3,079    | 122367       | 0,06   | 7676       |        |       |
| 2  | FL 360 nm           |                  | 3,300    | 52822        | 0,02   | 3324       |        |       |
| 3  | FL 360 nm           |                  | 9,789    | 10130        | 0,00   | 320        |        |       |
| 4  | FL 360 nm           |                  | 11,762   | 19832        | 0,01   | 399        |        |       |
| 5  | FL 360 nm           |                  | 12,671   | 610790       | 0,28   | 17851      |        |       |
| 6  | FL 360 nm           |                  | 13,495   | 529277       | 0,24   | 11459      |        |       |
| 7  | FL 360 nm           |                  | 14,465   | 373393       | 0,17   | 5603       |        |       |
| 8  | FL 360 nm           |                  | 17,587   | 12113        | 0,01   | 415        |        |       |
| 9  | FL 360 nm           |                  | 19,181   | 166254       | 0,08   | 3929       |        |       |
| 10 | FL 360 nm           |                  | 20,094   | 163064       | 0,07   | 3147       |        |       |
| 11 | FL 360 nm           |                  | 23,581   | 21965        | 0,01   | 874        |        |       |
| 12 | FL 360 nm           | Chlorogenic acid | 24,358   | 941464       | 0,43   | 18209      | 69,620 | ug/ml |
| 13 | FL 360 nm           |                  | 25,540   | 904860       | 0,42   | 13374      |        |       |

## IM-BAS

Project Name: project  
Reported by User: System



|    | Channel Description | Peak Name       | RT (min) | Area (V*sec) | % Area | Height (V) | Amount | Units |
|----|---------------------|-----------------|----------|--------------|--------|------------|--------|-------|
| 14 | FL 360 nm           |                 | 27,299   | 75068        | 0,03   | 3025       |        |       |
| 15 | FL 360 nm           |                 | 27,412   | 74105        | 0,03   | 2988       |        |       |
| 16 | FL 360 nm           | Caffeic acid    | 28,461   | 291331       | 0,13   | 4956       | 15,116 | ug/ml |
| 17 | FL 360 nm           |                 | 29,736   | 204124       | 0,09   | 3247       |        |       |
| 18 | FL 360 nm           |                 | 41,143   | 227836       | 0,10   | 4431       |        |       |
| 19 | FL 360 nm           |                 | 41,367   | 45467        | 0,02   | 3956       |        |       |
| 20 | FL 360 nm           |                 | 41,791   | 99376        | 0,05   | 3741       |        |       |
| 21 | FL 360 nm           |                 | 42,420   | 22168        | 0,01   | 1318       |        |       |
| 22 | FL 360 nm           |                 | 43,721   | 315208       | 0,14   | 18171      |        |       |
| 23 | FL 360 nm           |                 | 44,045   | 912326       | 0,42   | 24346      |        |       |
| 24 | FL 360 nm           | Ferulic acid    | 44,782   | 624676       | 0,29   | 13511      | 43,732 | ug/ml |
| 25 | FL 360 nm           |                 | 46,508   | 173774       | 0,08   | 5901       |        |       |
| 26 | FL 360 nm           |                 | 47,038   | 981973       | 0,45   | 34337      |        |       |
| 27 | FL 360 nm           |                 | 47,552   | 1088922      | 0,50   | 32917      |        |       |
| 28 | FL 360 nm           |                 | 48,285   | 1281980      | 0,59   | 51029      |        |       |
| 29 | FL 360 nm           |                 | 48,908   | 3788340      | 1,74   | 153957     |        |       |
| 30 | FL 360 nm           |                 | 49,314   | 2552252      | 1,17   | 134535     |        |       |
| 31 | FL 360 nm           |                 | 49,754   | 18069402     | 8,30   | 872571     |        |       |
| 32 | FL 360 nm           |                 | 50,178   | 34632353     | 15,92  | 903122     |        |       |
| 33 | FL 360 nm           |                 | 51,093   | 11821359     | 5,43   | 256599     |        |       |
| 34 | FL 360 nm           |                 | 52,258   | 7602715      | 3,49   | 136658     |        |       |
| 35 | FL 360 nm           | Rutin           | 53,451   | 2525219      | 1,16   | 72901      | 66,689 | ug/ml |
| 36 | FL 360 nm           |                 | 54,235   | 4058832      | 1,87   | 83586      |        |       |
| 37 | FL 360 nm           |                 | 54,800   | 1701504      | 0,78   | 58307      |        |       |
| 38 | FL 360 nm           |                 | 55,711   | 2086815      | 0,96   | 76936      |        |       |
| 39 | FL 360 nm           | Rosmarinic acid | 55,939   | 668475       | 0,31   | 74466      | 38,073 | ug/ml |
| 40 | FL 360 nm           |                 | 56,656   | 9354948      | 4,30   | 225878     |        |       |
| 41 | FL 360 nm           |                 | 57,618   | 30639833     | 14,08  | 265300     |        |       |
| 42 | FL 360 nm           |                 | 60,654   | 1822211      | 0,84   | 52187      |        |       |
| 43 | FL 360 nm           |                 | 62,388   | 9309827      | 4,28   | 213686     |        |       |
| 44 | FL 360 nm           |                 | 62,632   | 3579892      | 1,65   | 213786     |        |       |
| 45 | FL 360 nm           |                 | 62,989   | 3822067      | 1,76   | 311547     |        |       |
| 46 | FL 360 nm           | Quercetin       | 63,164   | 6427395      | 2,95   | 282954     | 74,073 | ug/ml |

## IM-BAS

Project Name: project  
Reported by User: System

*Breeze*

|    | Channel Description | Peak Name  | RT (min) | Area ( V*sec) | % Area | Height ( V) | Amount | Units |
|----|---------------------|------------|----------|---------------|--------|-------------|--------|-------|
| 47 | FL 360 nm           |            | 63,984   | 5510740       | 2,53   | 436817      |        |       |
| 48 | FL 360 nm           |            | 64,170   | 9063171       | 4,17   | 602847      |        |       |
| 49 | FL 360 nm           |            | 64,456   | 9237324       | 4,25   | 516780      |        |       |
| 50 | FL 360 nm           |            | 64,786   | 9077992       | 4,17   | 306594      |        |       |
| 51 | FL 360 nm           | Kaempferol | 65,767   | 843082        | 0,39   | 72177       | 6,851  | ug/ml |
| 52 | FL 360 nm           |            | 66,058   | 2216748       | 1,02   | 130126      |        |       |
| 53 | FL 360 nm           |            | 66,351   | 5112018       | 2,35   | 129970      |        |       |
| 54 | FL 360 nm           |            | 67,402   | 1129254       | 0,52   | 64294       |        |       |
| 55 | FL 360 nm           |            | 67,692   | 1411792       | 0,65   | 65434       |        |       |
| 56 | FL 360 nm           |            | 68,072   | 1541309       | 0,71   | 41801       |        |       |
| 57 | FL 360 nm           |            | 69,015   | 478951        | 0,22   | 24753       |        |       |
| 58 | FL 360 nm           |            | 69,269   | 477272        | 0,22   | 24860       |        |       |
| 59 | FL 360 nm           |            | 69,743   | 656790        | 0,30   | 44636       |        |       |
| 60 | FL 360 nm           |            | 69,949   | 2374824       | 1,09   | 51846       |        |       |
| 61 | FL 360 nm           |            | 71,414   | 560951        | 0,26   | 19429       |        |       |
| 62 | FL 360 nm           |            | 71,844   | 542188        | 0,25   | 19219       |        |       |
| 63 | FL 360 nm           |            | 72,421   | 593563        | 0,27   | 24199       |        |       |
| 64 | FL 360 nm           |            | 72,791   | 1181715       | 0,54   | 25779       |        |       |
| 65 | FL 360 nm           |            | 73,758   | 757004        | 0,35   | 14946       |        |       |
