# Supplementary material for: Hypoglycemic Effects of Extracts Obtained from Endemic Betonica bulgarica Degen and Neič
Source: MDPI journal article supplement (doi:10.3390/plants13101406), 2024-05-18
Supplement: s1 [file s1]

## SAMPLE INFORMATION

|              |               |                   |                       |
|--------------|---------------|-------------------|-----------------------|
| Sample Name: | BBL_1         | Acquired By:      | System                |
| Sample Type: | Unknown       | Sample Set Name:  |                       |
| Vial:        | 999           | Acq. Method:      | PolyPhenols           |
| Injection #: | 3             | Date Acquired:    | 02.9.2021 a. 11:57:12 |
| Run Time:    | 75,00 Minutes | Injection Volume: | 20,00 ul              |

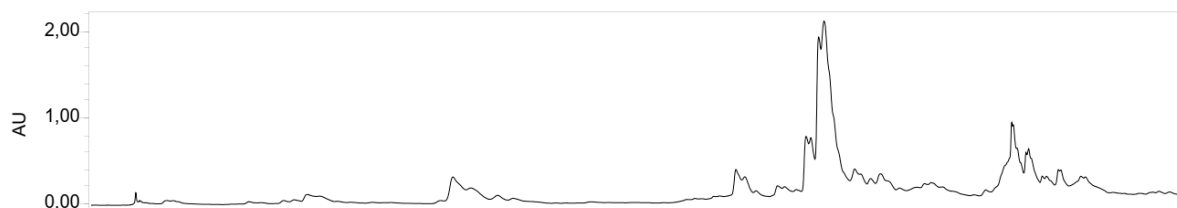

|    | Channel Description | Peak Name | RT (min) | Area ( V*sec) | % Area | Height ( V) | Amount | Units |
|----|---------------------|-----------|----------|---------------|--------|-------------|--------|-------|
| 1  | Pa 280 nm           |           | 0,246    | 691           | 0,00   | 72          |        |       |
| 2  | Pa 280 nm           |           | 0,945    | 541           | 0,00   | 62          |        |       |
| 3  | Pa 280 nm           |           | 1,080    | 914           | 0,00   | 126         |        |       |
| 4  | Pa 280 nm           |           | 1,205    | 2040          | 0,00   | 154         |        |       |
| 5  | Pa 280 nm           |           | 2,217    | 1404          | 0,00   | 111         |        |       |
| 6  | Pa 280 nm           |           | 2,233    | 655           | 0,00   | 107         |        |       |
| 7  | Pa 280 nm           |           | 3,072    | 1315513       | 0,20   | 142756      |        |       |
| 8  | Pa 280 nm           |           | 3,334    | 419196        | 0,06   | 55347       |        |       |
| 9  | Pa 280 nm           |           | 3,436    | 592476        | 0,09   | 43534       |        |       |
| 10 | Pa 280 nm           |           | 3,778    | 570265        | 0,09   | 27400       |        |       |
| 11 | Pa 280 nm           |           | 4,196    | 346993        | 0,05   | 18526       |        |       |
| 12 | Pa 280 nm           |           | 4,578    | 178202        | 0,03   | 13943       |        |       |
| 13 | Pa 280 nm           |           | 5,198    | 1620019       | 0,25   | 51927       |        |       |

## IM-BAS

Project Name: project  
Reported by User: System

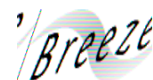

|    | Channel Description | Peak Name          | RT (min) | Area (V*sec) | % Area | Height (V) | Amount  | Units |
|----|---------------------|--------------------|----------|--------------|--------|------------|---------|-------|
| 14 | Pa 280 nm           |                    | 5,603    | 3024633      | 0,47   | 49790      |         |       |
| 15 | Pa 280 nm           | Gallic acid        | 6,405    |              |        |            |         |       |
| 16 | Pa 280 nm           |                    | 7,900    | 170221       | 0,03   | 5666       |         |       |
| 17 | Pa 280 nm           |                    | 8,700    | 35368        | 0,01   | 2386       |         |       |
| 18 | Pa 280 nm           |                    | 9,699    | 194180       | 0,03   | 6040       |         |       |
| 19 | Pa 280 nm           |                    | 10,792   | 1359525      | 0,21   | 32154      |         |       |
| 20 | Pa 280 nm           | Protocatehuic acid | 11,602   | 959969       | 0,15   | 20573      | 28,697  | ug/ml |
| 21 | Pa 280 nm           |                    | 12,560   | 226626       | 0,03   | 9765       |         |       |
| 22 | Pa 280 nm           |                    | 13,149   | 1453590      | 0,22   | 44756      |         |       |
| 23 | Pa 280 nm           |                    | 13,876   | 2139111      | 0,33   | 52065      |         |       |
| 24 | Pa 280 nm           |                    | 14,757   | 5488846      | 0,85   | 112271     |         |       |
| 25 | Pa 280 nm           |                    | 15,594   | 4935936      | 0,76   | 92669      |         |       |
| 26 | Pa 280 nm           |                    | 16,840   | 1269245      | 0,20   | 31945      |         |       |
| 27 | Pa 280 nm           |                    | 17,726   | 1116585      | 0,17   | 20441      |         |       |
| 28 | Pa 280 nm           |                    | 19,195   | 819719       | 0,13   | 17106      |         |       |
| 29 | Pa 280 nm           |                    | 19,993   | 368649       | 0,06   | 13397      |         |       |
| 30 | Pa 280 nm           | (+)-Catechin       | 20,484   | 762012       | 0,12   | 14553      | 55,267  | ug/ml |
| 31 | Pa 280 nm           |                    | 21,567   | 96756        | 0,01   | 4696       |         |       |
| 32 | Pa 280 nm           |                    | 22,237   | 46748        | 0,01   | 2158       |         |       |
| 33 | Pa 280 nm           |                    | 23,853   | 1122278      | 0,17   | 36054      |         |       |
| 34 | Pa 280 nm           | Chlorogenic acid   | 24,694   | 17013491     | 2,63   | 308828     | 411,563 | ug/ml |
| 35 | Pa 280 nm           |                    | 25,912   | 12213157     | 1,88   | 180511     |         |       |
| 36 | Pa 280 nm           | Vanillic acid      | 27,744   | 4739709      | 0,73   | 93904      | 148,015 | ug/ml |
| 37 | Pa 280 nm           | Caffeic acid       | 28,807   | 4571680      | 0,71   | 59600      | 50,868  | ug/ml |
| 38 | Pa 280 nm           |                    | 31,739   | 67695        | 0,01   | 3381       |         |       |
| 39 | Pa 280 nm           |                    | 32,379   | 67636        | 0,01   | 3226       |         |       |
| 40 | Pa 280 nm           | Syringic acid      | 33,283   | 39265        | 0,01   | 1739       | 2,992   | ug/ml |
| 41 | Pa 280 nm           |                    | 34,131   | 611473       | 0,09   | 12630      |         |       |
| 42 | Pa 280 nm           |                    | 35,266   | 45811        | 0,01   | 2128       |         |       |
| 43 | Pa 280 nm           | (-)-Epicatechin    | 36,164   | 5393         | 0,00   | 479        | 9,971   | ug/ml |
| 44 | Pa 280 nm           |                    | 37,143   | 180455       | 0,03   | 4304       |         |       |
| 45 | Pa 280 nm           |                    | 37,607   | 137291       | 0,02   | 3565       |         |       |
| 46 | Pa 280 nm           |                    | 39,083   | 104216       | 0,02   | 3935       |         |       |

## IM-BAS

Project Name: project  
Reported by User: System



|    | Channel Description | Peak Name       | RT (min) | Area (V*sec) | % Area | Height (V) | Amount   | Units |
|----|---------------------|-----------------|----------|--------------|--------|------------|----------|-------|
| 47 | Pa 280 nm           |                 | 40,651   | 1635559      | 0,25   | 42422      |          |       |
| 48 | Pa 280 nm           |                 | 40,876   | 420265       | 0,06   | 42205      |          |       |
| 49 | Pa 280 nm           |                 | 41,191   | 1487351      | 0,23   | 55365      |          |       |
| 50 | Pa 280 nm           |                 | 41,674   | 1502162      | 0,23   | 51836      |          |       |
| 51 | Pa 280 nm           | p-Coumaric acid | 42,487   | 2681721      | 0,41   | 80484      | 18,978   | ug/ml |
| 52 | Pa 280 nm           |                 | 42,892   | 2507193      | 0,39   | 84132      |          |       |
| 53 | Pa 280 nm           |                 | 43,995   | 14492505     | 2,24   | 393358     |          |       |
| 54 | Pa 280 nm           |                 | 44,604   | 10883467     | 1,68   | 309210     |          |       |
| 55 | Pa 280 nm           | Ferulic acid    | 45,368   | 7191816      | 1,11   | 146970     | 90,997   | ug/ml |
| 56 | Pa 280 nm           |                 | 46,833   | 7424794      | 1,15   | 205376     |          |       |
| 57 | Pa 280 nm           |                 | 47,311   | 7576982      | 1,17   | 195989     |          |       |
| 58 | Pa 280 nm           |                 | 48,103   | 5174020      | 0,80   | 163212     |          |       |
| 59 | Pa 280 nm           |                 | 48,776   | 15654521     | 2,42   | 779646     |          |       |
| 60 | Pa 280 nm           |                 | 49,099   | 17325051     | 2,67   | 763982     |          |       |
| 61 | Pa 280 nm           | Salicylic acid  | 49,639   | 34979398     | 5,40   | 1930010    | 2176,415 | ug/ml |
| 62 | Pa 280 nm           |                 | 50,003   | 119179160    | 18,39  | 2113700    |          |       |
| 63 | Pa 280 nm           |                 | 52,087   | 13933643     | 2,15   | 404596     |          |       |
| 64 | Pa 280 nm           |                 | 52,499   | 8920704      | 1,38   | 345685     |          |       |
| 65 | Pa 280 nm           | Rutin           | 53,174   | 9536446      | 1,47   | 294228     | 587,019  | ug/ml |
| 66 | Pa 280 nm           | Hesperidin      | 53,847   | 22247721     | 3,43   | 348721     | 363,990  | ug/ml |
| 67 | Pa 280 nm           |                 | 55,149   | 7066560      | 1,09   | 186536     |          |       |
| 68 | Pa 280 nm           | Rosmarinic acid | 56,345   | 10648983     | 1,64   | 196008     | 226,674  | ug/ml |
| 69 | Pa 280 nm           |                 | 56,850   | 6878679      | 1,06   | 238308     |          |       |
| 70 | Pa 280 nm           |                 | 57,310   | 10772704     | 1,66   | 250535     |          |       |
| 71 | Pa 280 nm           |                 | 58,080   | 18086512     | 2,79   | 200893     |          |       |
| 72 | Pa 280 nm           |                 | 60,216   | 4336283      | 0,67   | 111349     |          |       |
| 73 | Pa 280 nm           |                 | 61,029   | 6573630      | 1,01   | 168170     |          |       |
| 74 | Pa 280 nm           |                 | 62,801   | 38286214     | 5,91   | 950982     |          |       |
| 75 | Pa 280 nm           |                 | 62,933   | 11433298     | 1,76   | 902663     |          |       |
| 76 | Pa 280 nm           | Quercetin       | 63,200   | 12096368     | 1,87   | 644339     | 388,646  | ug/ml |
| 77 | Pa 280 nm           |                 | 63,777   | 6539519      | 1,01   | 608760     |          |       |
| 78 | Pa 280 nm           |                 | 63,948   | 23891847     | 3,69   | 646267     |          |       |
| 79 | Pa 280 nm           |                 | 64,886   | 5525203      | 0,85   | 332190     |          |       |

## IM-BAS

Project Name: project  
Reported by User: System

|    | Channel Description | Peak Name  | RT (min) | Area ( V*sec) | % Area | Height ( V) | Amount  | Units |
|----|---------------------|------------|----------|---------------|--------|-------------|---------|-------|
| 80 | Pa 280 nm           |            | 65,167   | 11933419      | 1,84   | 330148      |         |       |
| 81 | Pa 280 nm           | Kaempferol | 65,980   | 6564243       | 1,01   | 407623      | 195,610 | ug/ml |
| 82 | Pa 280 nm           |            | 66,139   | 11261618      | 1,74   | 403292      |         |       |
| 83 | Pa 280 nm           |            | 67,512   | 16246542      | 2,51   | 331935      |         |       |
| 84 | Pa 280 nm           |            | 67,820   | 22577457      | 3,48   | 324870      |         |       |
| 85 | Pa 280 nm           |            | 69,467   | 1285908       | 0,20   | 143361      |         |       |
| 86 | Pa 280 nm           |            | 69,698   | 6609638       | 1,02   | 147368      |         |       |
| 87 | Pa 280 nm           |            | 70,466   | 3043896       | 0,47   | 136105      |         |       |
| 88 | Pa 280 nm           |            | 70,923   | 2783193       | 0,43   | 127531      |         |       |
| 89 | Pa 280 nm           |            | 71,469   | 3652867       | 0,56   | 136665      |         |       |
| 90 | Pa 280 nm           |            | 71,636   | 2928164       | 0,45   | 136754      |         |       |
| 91 | Pa 280 nm           |            | 72,419   | 6029732       | 0,93   | 151793      |         |       |
| 92 | Pa 280 nm           |            | 72,827   | 5574846       | 0,86   | 161700      |         |       |
| 93 | Pa 280 nm           |            | 73,558   | 10313371      | 1,59   | 154785      |         |       |

**IM-BAS**

Project Name: project  
Reported by User: System

*Breeze***SAMPLE INFORMATION**

|              |               |                   |                       |
|--------------|---------------|-------------------|-----------------------|
| Sample Name: | BBL_1         | Acquired By:      | System                |
| Sample Type: | Unknown       | Sample Set Name:  |                       |
| Vial:        | 999           | Acq. Method:      | PolyPhenols           |
| Injection #: | 3             | Date Acquired:    | 02.9.2021 a. 11:57:12 |
| Run Time:    | 75,00 Minutes | Injection Volume: | 20,00 ul              |

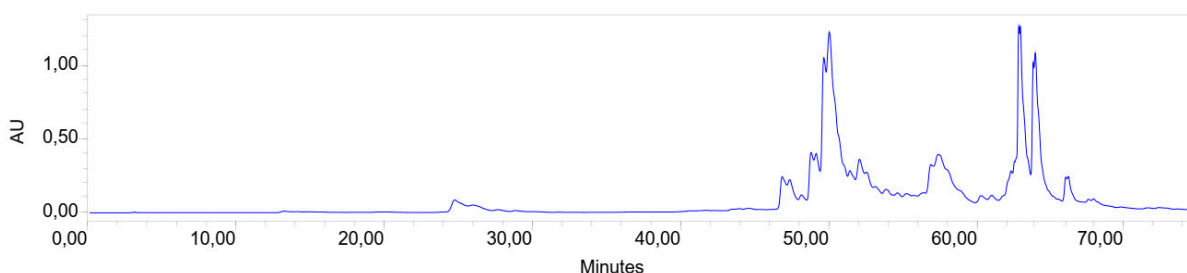

Channel: 2487Channel 2 Channel Desc.: FL 360 nm Processing Method: PolyPhenols UV

|    | Channel Description | Peak Name        | RT (min) | Area (µV*sec) | % Area | Height (µV) | Amount  | Units |
|----|---------------------|------------------|----------|---------------|--------|-------------|---------|-------|
| 1  | FL 360 nm           |                  | 3,052    | 89780         | 0,02   | 5451        |         |       |
| 2  | FL 360 nm           |                  | 10,099   | 16054         | 0,00   | 481         |         |       |
| 3  | FL 360 nm           |                  | 13,149   | 358155        | 0,10   | 9487        |         |       |
| 4  | FL 360 nm           |                  | 14,029   | 143020        | 0,04   | 4349        |         |       |
| 5  | FL 360 nm           |                  | 14,667   | 105571        | 0,03   | 3018        |         |       |
| 6  | FL 360 nm           |                  | 17,577   | 10081         | 0,00   | 602         |         |       |
| 7  | FL 360 nm           |                  | 18,060   | 12316         | 0,00   | 624         |         |       |
| 8  | FL 360 nm           |                  | 19,424   | 47963         | 0,01   | 2648        |         |       |
| 9  | FL 360 nm           |                  | 19,802   | 109381        | 0,03   | 2800        |         |       |
| 10 | FL 360 nm           |                  | 20,318   | 104285        | 0,03   | 2610        |         |       |
| 11 | FL 360 nm           |                  | 22,742   | 18613         | 0,01   | 539         |         |       |
| 12 | FL 360 nm           | Chlorogenic acid | 24,695   | 4702854       | 1,29   | 84968       | 332,799 | ug/ml |
| 13 | FL 360 nm           |                  | 25,906   | 3344014       | 0,92   | 50288       |         |       |

## IM-BAS

Project Name: project  
Reported by User: System



|    | Channel Description | Peak Name       | RT (min) | Area (V*sec) | % Area | Height (V) | Amount  | Units |
|----|---------------------|-----------------|----------|--------------|--------|------------|---------|-------|
| 14 | FL 360 nm           |                 | 27,608   | 945306       | 0,26   | 18677      |         |       |
| 15 | FL 360 nm           | Caffeic acid    | 28,789   | 655834       | 0,18   | 12759      | 33,352  | ug/ml |
| 16 | FL 360 nm           |                 | 29,988   | 299417       | 0,08   | 5473       |         |       |
| 17 | FL 360 nm           |                 | 31,730   | 43100        | 0,01   | 1463       |         |       |
| 18 | FL 360 nm           |                 | 33,883   | 11726        | 0,00   | 549        |         |       |
| 19 | FL 360 nm           |                 | 36,279   | 23564        | 0,01   | 755        |         |       |
| 20 | FL 360 nm           |                 | 36,769   | 37945        | 0,01   | 894        |         |       |
| 21 | FL 360 nm           |                 | 38,075   | 13658        | 0,00   | 591        |         |       |
| 22 | FL 360 nm           |                 | 40,600   | 319265       | 0,09   | 8186       |         |       |
| 23 | FL 360 nm           |                 | 40,916   | 125186       | 0,03   | 8596       |         |       |
| 24 | FL 360 nm           |                 | 41,615   | 621449       | 0,17   | 11794      |         |       |
| 25 | FL 360 nm           |                 | 42,209   | 398707       | 0,11   | 11112      |         |       |
| 26 | FL 360 nm           |                 | 42,795   | 223089       | 0,06   | 10389      |         |       |
| 27 | FL 360 nm           |                 | 43,530   | 645758       | 0,18   | 20559      |         |       |
| 28 | FL 360 nm           |                 | 43,903   | 706169       | 0,19   | 24333      |         |       |
| 29 | FL 360 nm           |                 | 44,591   | 1454008      | 0,40   | 26029      |         |       |
| 30 | FL 360 nm           | Ferulic acid    | 45,423   | 505061       | 0,14   | 18444      | 35,761  | ug/ml |
| 31 | FL 360 nm           |                 | 46,172   | 614984       | 0,17   | 19926      |         |       |
| 32 | FL 360 nm           |                 | 46,817   | 6546047      | 1,80   | 242367     |         |       |
| 33 | FL 360 nm           |                 | 47,325   | 7199671      | 1,97   | 221683     |         |       |
| 34 | FL 360 nm           |                 | 48,117   | 3429663      | 0,94   | 118112     |         |       |
| 35 | FL 360 nm           |                 | 48,772   | 8147565      | 2,23   | 406324     |         |       |
| 36 | FL 360 nm           |                 | 49,112   | 9145475      | 2,51   | 399858     |         |       |
| 37 | FL 360 nm           |                 | 49,640   | 18729665     | 5,14   | 1051367    |         |       |
| 38 | FL 360 nm           |                 | 50,003   | 58352526     | 16,00  | 1225419    |         |       |
| 39 | FL 360 nm           |                 | 51,394   | 7946436      | 2,18   | 283336     |         |       |
| 40 | FL 360 nm           |                 | 52,045   | 11657228     | 3,20   | 361097     |         |       |
| 41 | FL 360 nm           |                 | 52,521   | 7551863      | 2,07   | 273858     |         |       |
| 42 | FL 360 nm           | Rutin           | 53,096   | 5864223      | 1,61   | 175801     | 157,304 | ug/ml |
| 43 | FL 360 nm           |                 | 53,839   | 6482788      | 1,78   | 156238     |         |       |
| 44 | FL 360 nm           |                 | 54,608   | 4154267      | 1,14   | 132678     |         |       |
| 45 | FL 360 nm           |                 | 55,206   | 4549033      | 1,25   | 128334     |         |       |
| 46 | FL 360 nm           | Rosmarinic acid | 55,679   | 2854811      | 0,78   | 115675     | 145,953 | ug/ml |

# IM-BAS

Project Name: project  
Reported by User: System

*Breeze*

|    | Channel Description | Peak Name  | RT (min) | Area ( V*sec) | % Area | Height ( V) | Amount  | Units |
|----|---------------------|------------|----------|---------------|--------|-------------|---------|-------|
| 47 | FL 360 nm           |            | 56,353   | 3925003       | 1,08   | 134272      |         |       |
| 48 | FL 360 nm           |            | 56,869   | 7839095       | 2,15   | 326074      |         |       |
| 49 | FL 360 nm           |            | 57,358   | 36575747      | 10,03  | 393789      |         |       |
| 50 | FL 360 nm           |            | 60,251   | 4677697       | 1,28   | 115476      |         |       |
| 51 | FL 360 nm           |            | 60,977   | 4412089       | 1,21   | 117166      |         |       |
| 52 | FL 360 nm           |            | 62,284   | 9631167       | 2,64   | 283213      |         |       |
| 53 | FL 360 nm           |            | 62,526   | 3487810       | 0,96   | 349337      |         |       |
| 54 | FL 360 nm           |            | 62,808   | 12344401      | 3,39   | 1266189     |         |       |
| 55 | FL 360 nm           |            | 62,900   | 29319651      | 8,04   | 1265318     |         |       |
| 56 | FL 360 nm           | Quercetin  | 63,792   | 8959832       | 2,46   | 1021250     | 104,347 | ug/ml |
| 57 | FL 360 nm           |            | 63,921   | 32960673      | 9,04   | 1083608     |         |       |
| 58 | FL 360 nm           |            | 65,437   | 1837187       | 0,50   | 93476       |         |       |
| 59 | FL 360 nm           | Kaempferol | 65,983   | 3382917       | 0,93   | 243128      | 37,815  | ug/ml |
| 60 | FL 360 nm           |            | 66,146   | 8585691       | 2,35   | 247105      |         |       |
| 61 | FL 360 nm           |            | 67,505   | 1935997       | 0,53   | 91852       |         |       |
| 62 | FL 360 nm           |            | 67,845   | 6036948       | 1,66   | 95096       |         |       |
| 63 | FL 360 nm           |            | 69,500   | 369001        | 0,10   | 37315       |         |       |
| 64 | FL 360 nm           |            | 69,686   | 2898875       | 0,80   | 40240       |         |       |
| 65 | FL 360 nm           |            | 71,593   | 1736798       | 0,48   | 33868       |         |       |
| 66 | FL 360 nm           |            | 72,272   | 1531479       | 0,42   | 36468       |         |       |
| 67 | FL 360 nm           |            | 72,774   | 1039704       | 0,29   | 33162       |         |       |
| 68 | FL 360 nm           |            | 73,560   | 1821941       | 0,50   | 27123       |         |       |
